# Supplementary material for: The postcranial skeleton of Cerrejonisuchus improcerus (Crocodyliformes: Dyrosauridae) and the unusual anatomy of dyrosaurids
Source: PeerJ journal article supplement (doi:10.7717/peerj.11222), 2021-05-10
Supplement: Cerrejonisuchus-SI.pdf [file Cerrejonisuchus-SI.pdf]

## 1 SUPPLEMENTARY INFORMATION

### 2 A MEASUREMENTS

3 We used laser (Creaform Handyscan 300) and white light (Artec Eva) surface scanners to acquire  
4 additional measurements on 3D models, using the software GOM Inspect 2019. We laser scanned all  
5 the elements of the holotype of *Congosaurus bequaerti* (MRAC 1741–1743, 1745, 1796, 1797, 1799,  
6 1802, 1803, 1806, 1809–11, 1813–1819, 1822–1832 (A, B & C), 1835 (A, B & C)-1841, 1844–1846,  
7 1848–1858, 1860–1874, 1876, 1877, 1879, 1882–1884, 1887–1896), at resolution ranging from 0.3 to 0.5  
8 mm, depending on the size of the element. We surface scanned *Hyposaurus natator* (NJSM 23368) using  
9 structured white light with error down to 0.5 mm, and this scan was complemented by digital caliper  
10 measurements of the cast replica of both femora and humeri and from measurements gathered prior to the  
11 mounting of the specimen (W. Callahan pers. comm. 14 August 2019).

### 12 B CROCODYLIFORM HABITATS

13 The habitat of the fossil crocodyliforms analyzed ('thanatocoenosis' on our graphs) were either directly  
14 taken or inferred from literature. Here is a list of our species and the corresponding literature for their  
15 habitat:

- 16 • *Anthracosuchus balrogus* in Hastings et al. [2014]
- 17 • *Cerrejonisuchus improcerus* in Hastings et al. [2010, 2011]
- 18 • *Dyrosaurus maghribensis* in Jouve et al. [2006] (plus Yans et al. [2014])
- 19 • *Hyposaurus natator* (*Hyposaurus rogersii* is now a *nomen dubium* see Jouve et al. [2020]) from  
20 Denton et al. [1997], Wilberg et al. [2019]
- 21 • *Terminonaris browni* [Osborn, 1904] in Wu et al. [2001], Adams et al. [2011], Wilberg et al. [2019]
- 22 • *Congosaurus bequaerti* Schwarz et al. [2006], Schwarz-Wings et al. [2009], Wilberg et al. [2019]
- 23 • *Thoracosaurus neocesariensis* (De Kay, 1842) in Carpenter [1983], Wilberg et al. [2019]
- 24 • *Gavialosuchus/Thecachampsia americana* in Lara [2012]
- 25 • *Metriorhynchus moreli* in Buffetaut [1981], Young et al. [2010], Wilberg et al. [2019]
- 26 • *Suchodus durobrivensis* in Buffetaut [1981], Young et al. [2010], Wilberg et al. [2019]
- 27 • *Lemmysuchus obtusidens* in Buffetaut [1981], Wilberg et al. [2019]
- 28 • *Steneosaurus bollensis* in Buffetaut [1981], Wilberg et al. [2019]
- 29 • *Metriorhynchus cultridens* in Buffetaut [1981], Young et al. [2010], Wilberg et al. [2019]
- 30 • *Suchodus superciliosus* in Buffetaut [1981], Young et al. [2010], Wilberg et al. [2019]

31 *Cerrejonisuchus improcerus* is interpreted as 'less aquatic than *Acherontisuchus guajiraensis*' ac-  
32 cording to Hastings et al. [2011], so we placed it under the 'terrestrial' label but only to oppose it to the  
33 aquatic-freshwater lifestyle inferred for *Acherontisuchus guajiraensis*. *Cerrejonisuchus improcerus* is not  
34 understood as fully terrestrial, but is here more viewed as *Osteolaemus tetraspis*.

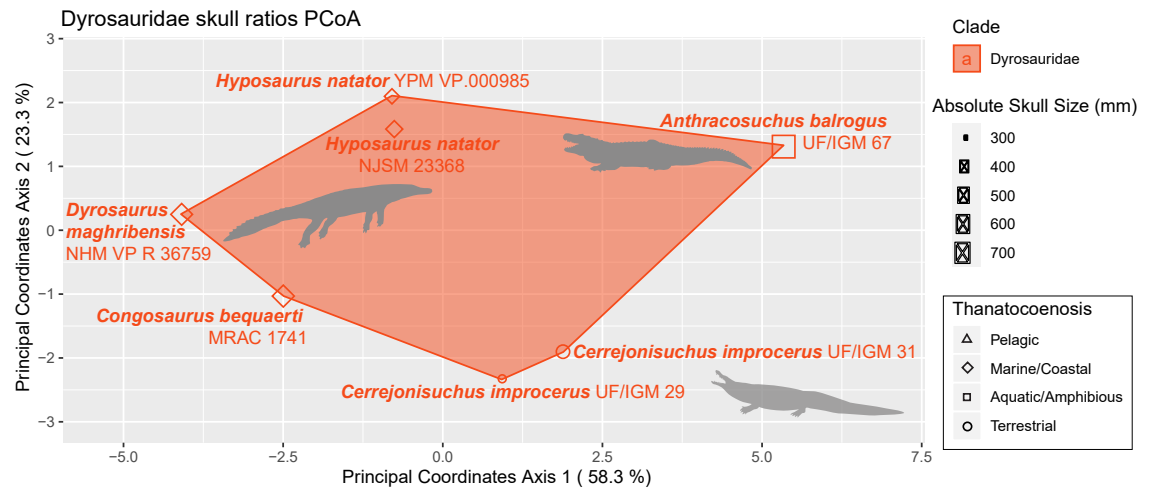

**Figure SI 1.** Morphospace representing dissimilarity between dyrosaurid taxa using the first two PCoA axes, based on the dyrosaurid skull ratio dataset. Polygon encompasses Dyrosauridae members while colored symbols illustrate lifestyles. The relative size of the lifestyle symbols depends on the absolute skull size of the specimen. *Hyposaurus vector* by Nobu Tamura (vectorized by Zimices); *Anthracosuchus vector* by Roberto D'iaz Sibaja

## C DYROSAURID PCOA

In order to assess more specifically the morphological variations among dyrosaurids, two additional datasets were composed and analyzed: the first one only comprised skull ratios (25 ratios - columns, of which 5 are area ratios), and the second one only had postcranial ratios (170 ratios - columns, of which 73 are area ratios). Statistical analyses were conducted following the exact same method as described in the main article.

As the osteological and taxonomic status of the NJSM 12293 specimen are unclear [Morgan et al., 2018, Denton et al., 1997], we have decided to only stipulate its inventory number in our analyses.

The skull-dataset comprises 11 dyrosaurid specimens (11 rows) and 25 skull ratios (25 columns, of which 5 are area ratios), and has a total of 55.27% of missing data initially. This number is reduced to 27.47% after application of a completeness threshold of 25% for the characters and 50% for the taxa. The list of individuals of this dataset is available below, see table SI 2. Completeness thresholds of 25% and 50% have been respectively applied to columns and rows to obtain a complete distance matrix (*i.e.* 0% of missing values). The results are presented on fig. SI 1.

The postcranial-dataset comprises 40 dyrosaurid specimens (40 rows) and 170 postcranial ratios (170 columns, of which 73 are area ratios), and has a total of 91.25% of missing data initially. This number is reduced to 35.76% after application of a completeness threshold of 10% for the characters and 40% for the taxa. The list of individuals of this dataset is available below, see table SI 3. Completeness thresholds of 10% and 40% have been respectively applied to columns and rows to obtain a complete distance matrix (*i.e.* 0% of missing values). The results are presented on fig. SI 2.

On fig. SI 1, the dyrosaurids seem to be distributed as a function of their phylogenetic relationships (see Hastings et al. [2014], Wilberg et al. [2019], or it could be strongly influenced by longirostry): it is possible to draw a line on the first axis to separate the basal (right of graph) from the derived dyrosaurids (left of graph). Furthermore, *Anthracosuchus balrogus* and *Cerrejonisuchus improcerus* are found on two distinct poles, which means that they can be told apart from the second axis as well.

Yet, the major difference with the dyrosaurid phylogeny is the absence of a hyposaurine cluster: here *Congosaurus bequaerti* is more dissimilar to *Hyposaurus natator* than it is to *Dyrosaurus maghribensis*.

Hyposaurine dyrosaurids are grouped together on the left portion of the graph (fig. SI 2), with the

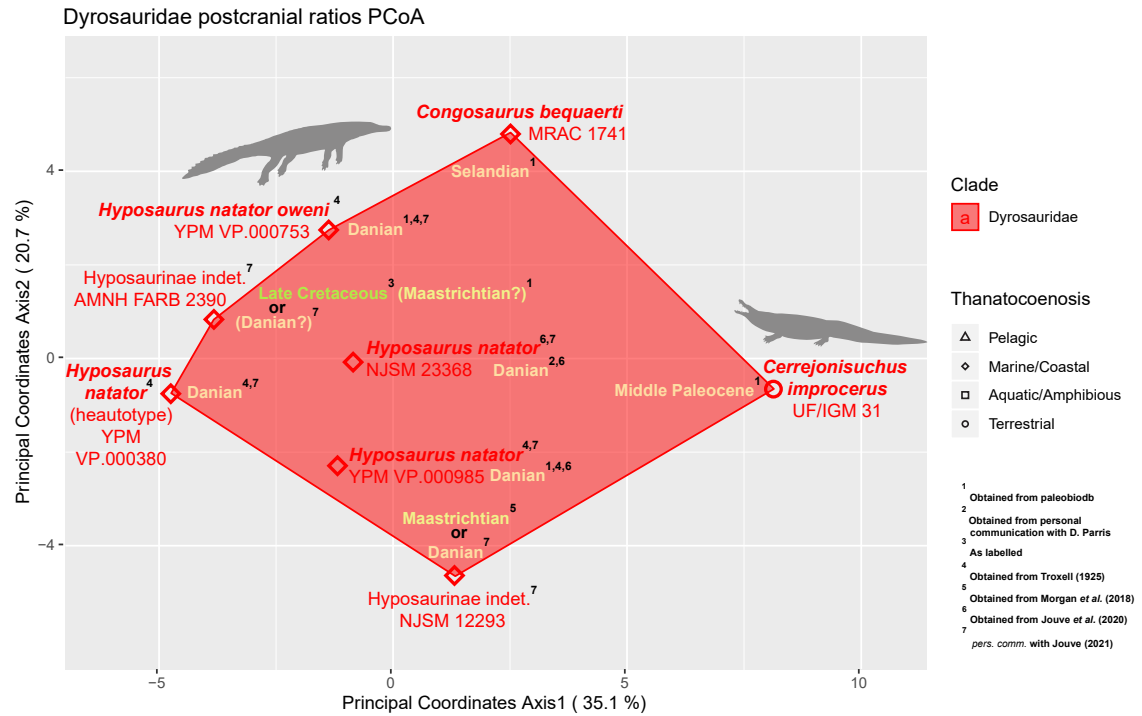

**Figure SI 2.** Morphospace representing dissimilarity between dyrosaurid taxa using the first two PCoA axes, with the dyrosaurid body ratio dataset. Polygon encompasses Dyrosauridae members while colored symbols illustrate lifestyles. *Hyposaurus vector* by Nobu Tamura (vectorized by Zimices).

67 Danian [Jouve et al., 2020] specimens of *Hyposaurus natator* (NJSM 23368 and YPM VP.000985 respec-  
68 tively) occupying center positions of the convex hull. *Cerrejonisuchus improcerus* is isolated and appears  
69 mostly dissimilar to *Hyposaurus* spp. The specimens that occupy the closest position to *Cerrejonisuchus*  
70 *improcerus* are the NJSM 12293 specimen and the holotype of *Congosaurus bequaerti*. As a result, the  
71 pattern of morphospace occupation reflect a phylogenetical clustering along the first axis, but could also  
72 reflect an environmental lifestyle splitting.

73  
74 The *Hyposaurus* species are spaced so that the holotype specimen (YPM VP.000985) and the heauto-  
75 type specimen (YPM VP.000380) of *Hyposaurus natator* are close to one another, while the specimen  
76 YPM VP.000753 appears more distant to them. This specimen was previously attributed to distinct  
77 subspecies, *Hyposaurus natator oweni* [Troxell, 1925]. A thorough investigation of the postcranial  
78 material previously (see Jouve et al. [2020]) referred to as *Hyposaurus* appears now necessary [Jouve  
79 et al., 2020]. It is possible that it might reveal species-level differences within this assemblage.

## 80 **D THE SKULL**

81 The skull of UF/IGM 31 (see fig. SI 14 in Supplementary Information), while not totally complete,  
82 strongly resembles that of the holotype UF/IGM 29 which is figured and extensively described in Hastings  
83 et al. [2010]. Here the dorsal skull length of UF/IGM 31 reaches 386 mm from the tip of the snout  
84 (premaxillae) to the quadrate, making it a longer specimen than the holotype UF/IGM 29 [Hastings et al.,  
85 2010], which is 299.5 mm long.

86  
87 The whole dorsal surface of the skull bears shallow pits. The snout is short (179 mm from tip of  
88 the snout to the orbits), and reaches approximately 46% of the total skull length. There are two major  
89 snout constrictions: the first one near the anterior margin of the nasal cavity, the second one directly  
90 posterior to the premaxillary. These constrictions give room for large mandibular teeth. The premaxillary  
91 has four alveoli, whereas the maxillary possesses eleven alveoli. The orbits are anterodorsally oriented,  
92 and their shape is oval with the major axis mediolaterally oriented. They are bordered by the lacrimal  
93 and prefrontal anteriorly, by the jugal lateral, by the frontal medially, and by the postorbital posteriorly.  
94 The supratemporal fenestra are reduced (about 59% of the infratemporal fenestra length), and close to  
95 the orbits. The supra temporal fenestra is limited by the postorbital anteriolaterally, by the frontal and  
96 parietal medially, and the squamosal posterolaterally. The nasal cavity is positioned anteriorly (near the  
97 skull margin), and is oval with the minor axis anteroposteriorly oriented. The nasal cavity is enclosed  
98 within the premaxillary (and thus does not meet with the nasal bone). The infratemporal fenestra starts at  
99 about the mid length of the supratemporal fenestra, and is mainly formed by the squamosal, jugal and  
100 quadratojugal (there is a presumed contribution of the postorbital).



101 **E ADDITIONAL FIGURES**

Variation of the angle of the pre- and postzygapophysis throughout the axial skeleton of *Congosaurus*, *Mecistops*, *Cerrejonisuchus*, *Hyposaurus*

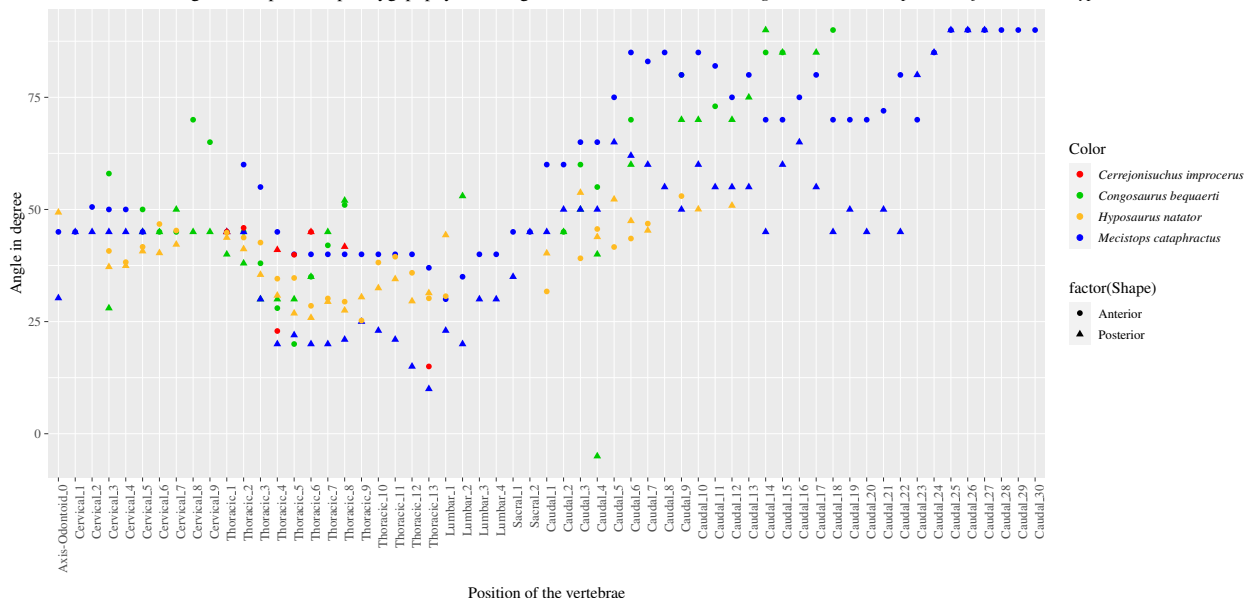

**Figure SI 3.** Evolution of the inclination angle in degree ° of the pre- and postzygapophysis throughout the axial skeletons of: *Congosaurus bequaerti*, *Mecistops cataphractus* (RBNIS 18374), *Hyposaurus natator* (NJSM 23368), and *Cerrejonisuchus improcerus* (UF/IGM 31). The angle is taken from the coronal plane. Position of each vertebrae is listed on the abscissa axis.

Variation of the neural spine length throughout the axial skeleton of *Congosaurus*, *Mecistops*, *Cerrejonisuchus*, *Hyposaurus*

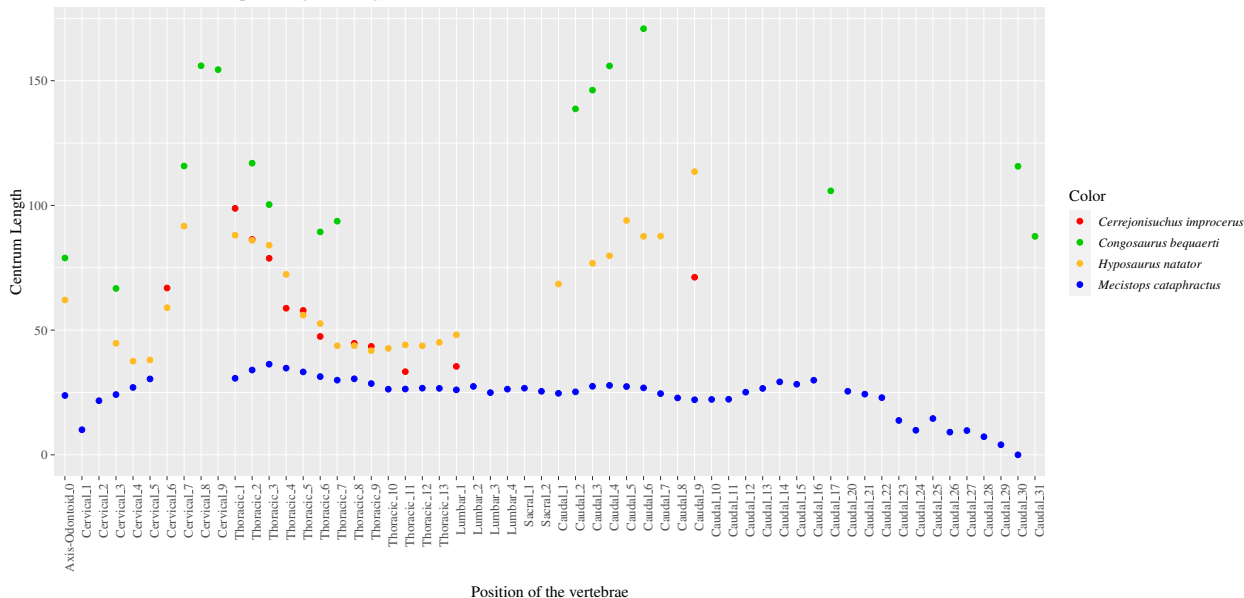

**Figure SI 4.** Scatter plot of the neural height variation throughout the axial skeleton of *Congosaurus bequaerti*, *Mecistops cataphractus* (RBNIS 18374), *Hyposaurus natator* (NJSM 23368), and *Cerrejonisuchus improcerus* (UF/IGM 31). Position of each vertebrae listed on the abscissa axis.

Variation of centrum width throughout the axial skeleton of *Congosaurus*, *Mecistops*, *Cerrejonisuchus*, *Hyposaurus*

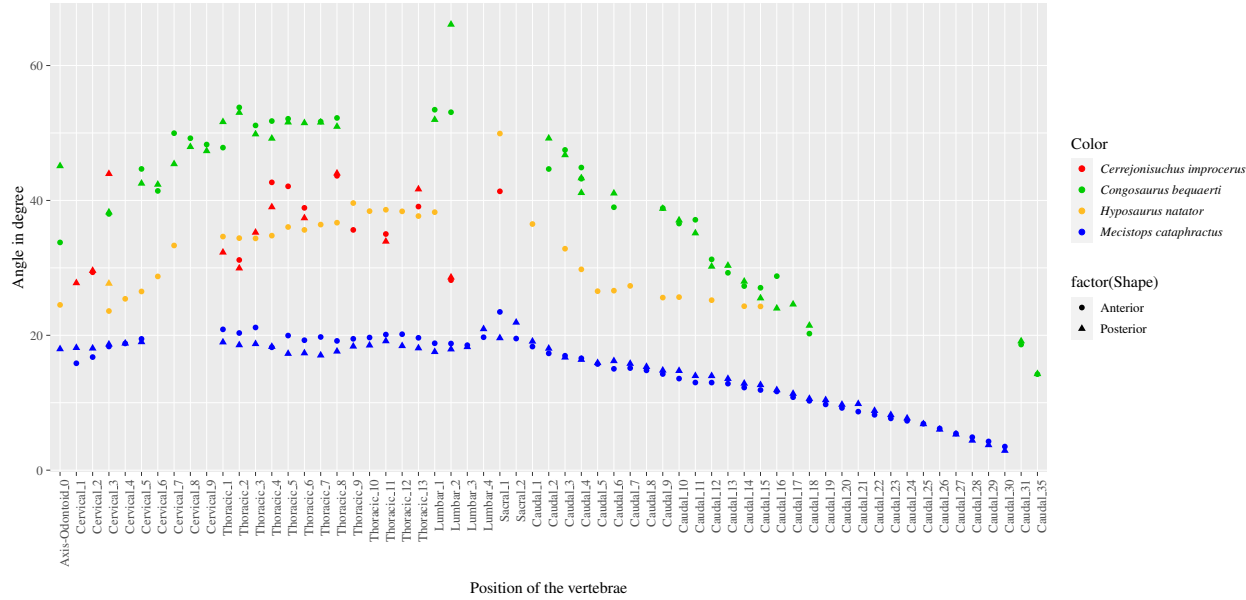

**Figure SI 5.** Scatter plot of the centrum width variation throughout the axial skeleton of *Congosaurus bequaerti*, *Mecistops cataphractus* (RBNIS 18374), *Hyposaurus natator* (NJSM 23368), and *Cerrejonisuchus improcerus* (UF/IGM 31). Position of each vertebrae listed on the abscissa axis.

Variation of centrum height throughout the axial skeleton of *Congosaurus*, *Mecistops*, *Cerrejonisuchus*, *Hyposaurus*

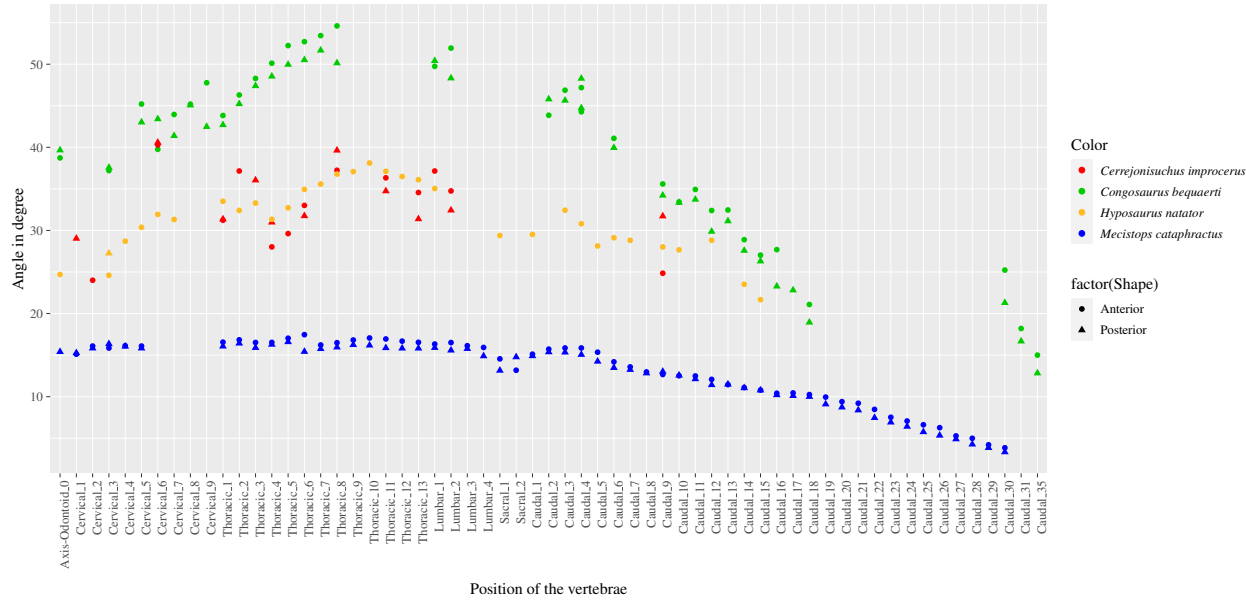

**Figure SI 6.** Scatter plot of the centrum height variation throughout the axial skeleton of *Congosaurus bequaerti*, *Mecistops cataphractus* (RBNIS 18374), *Hyposaurus natator* (NJSM 23368), and *Cerrejonisuchus improcerus* (UF/IGM 31). Position of each vertebrae listed on the abscissa axis.

Neural height over heuristic centrum size throughout the axial skeleton of *Congosaurus*, *Cerrejonisuchus*, *Mecistops*, *Hyposaurus*

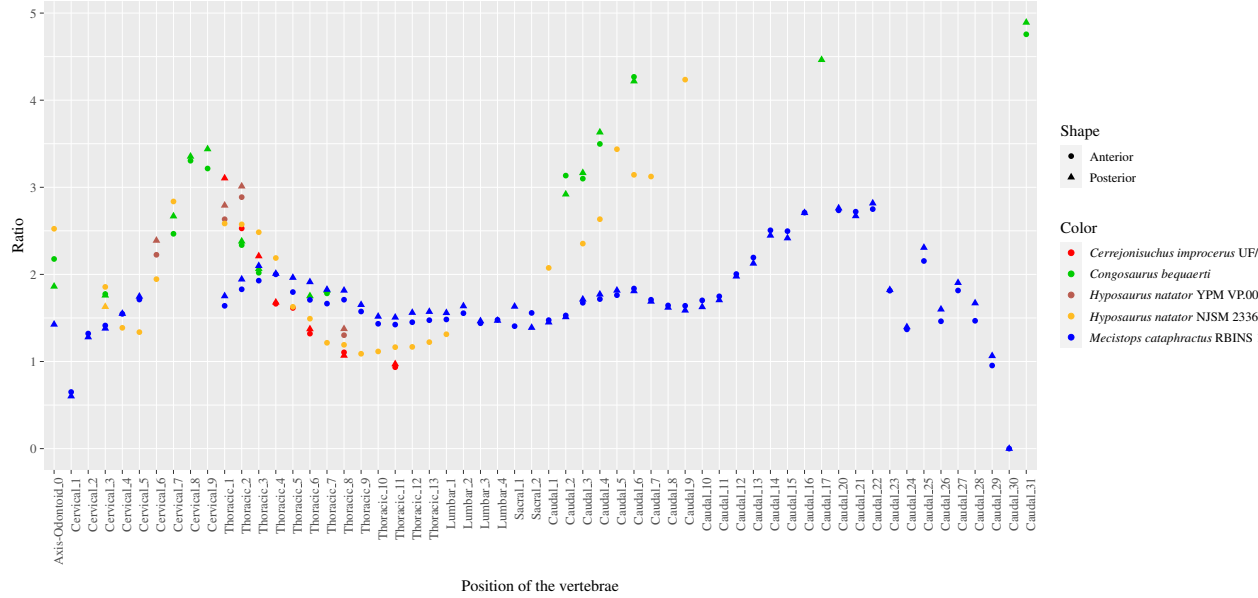

**Figure SI 7.** Estimation via heuristic of the neural spine height variation throughout the axial skeleton of *Congosaurus bequaerti*, *Hyposaurus natator* (NJSM 23368 and YPM VP.000985), *Cerrejonisuchus improcerus* (UF/IGM 31), and *Mecistops cataphractus* (RBNIS 18374). Position of each vertebrae listed on the abscissa axis.

Lateral process length over heuristic centrum size throughout the axial skeleton of *Congosaurus*, *Cerrejonisuchus*, *Mecistops*, *Hyposaurus*

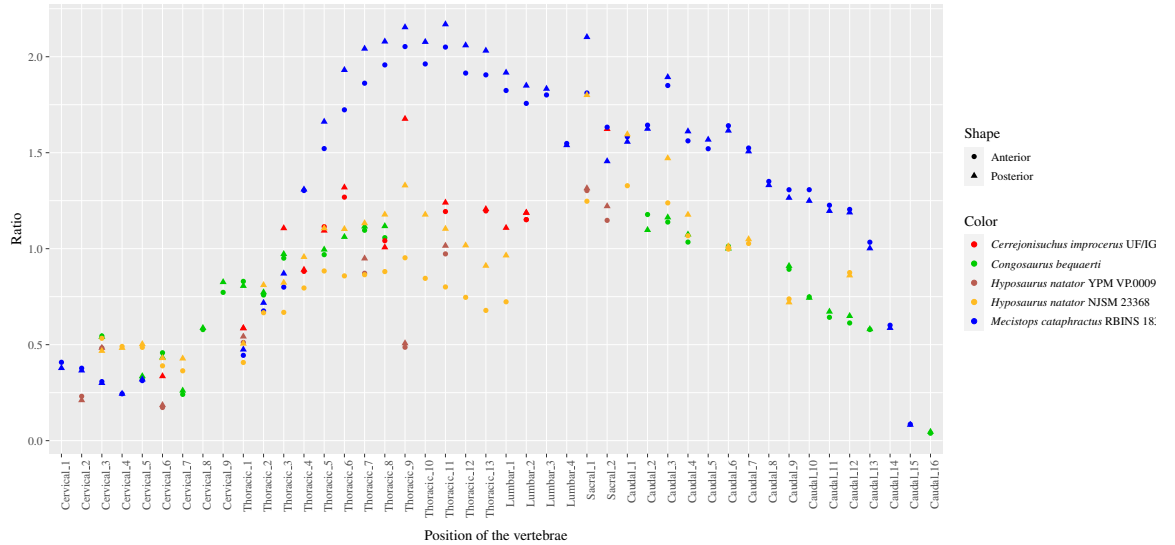

**Figure SI 8.** Estimation via heuristic of the maximal lateral process length variation throughout the axial skeleton of *Congosaurus bequaerti*, *Hyposaurus natator* (NJSM 23368 and YPM VP.000985), *Cerrejonisuchus improcerus* (UF/IGM 31), and *Mecistops cataphractus* (RBNIS 18374). Position of each vertebrae listed on the abscissa axis.

Neural spine anteroposterior width over heuristic centrum size throughout the axial skeleton of *Congosaurus*, *Crerejonisuchus*, *Mecistops*, *Hyposaurus*

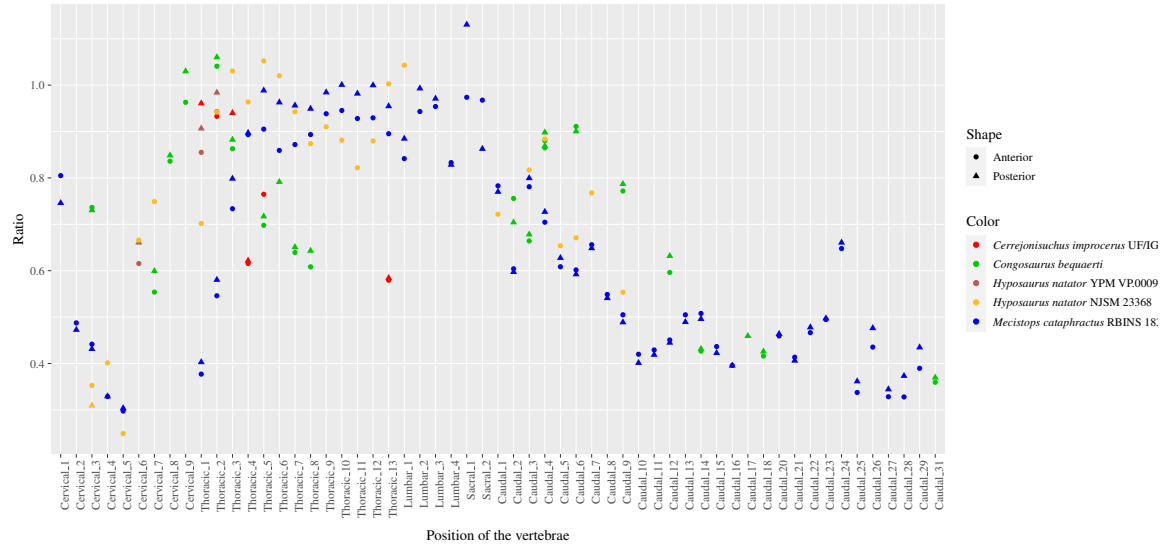

**Figure SI 9.** Estimation via heuristic of the neural spine anteroposterior width variation throughout the axial skeleton of *Congosaurus bequaerti*, *Hyposaurus natator* (NJSJ 23368 and YPM VP.000985), *Crerejonisuchus improcerus* (UF/IGM 31), and *Mecistops cataphractus* (RBNIS 18374). Position of each vertebrae listed on the abscissa axis.

Variation of the length of the lateral process throughout the axial skeleton of *Congosaurus*, *Mecistops*, *Crerejonisuchus*, *Hyposaurus*

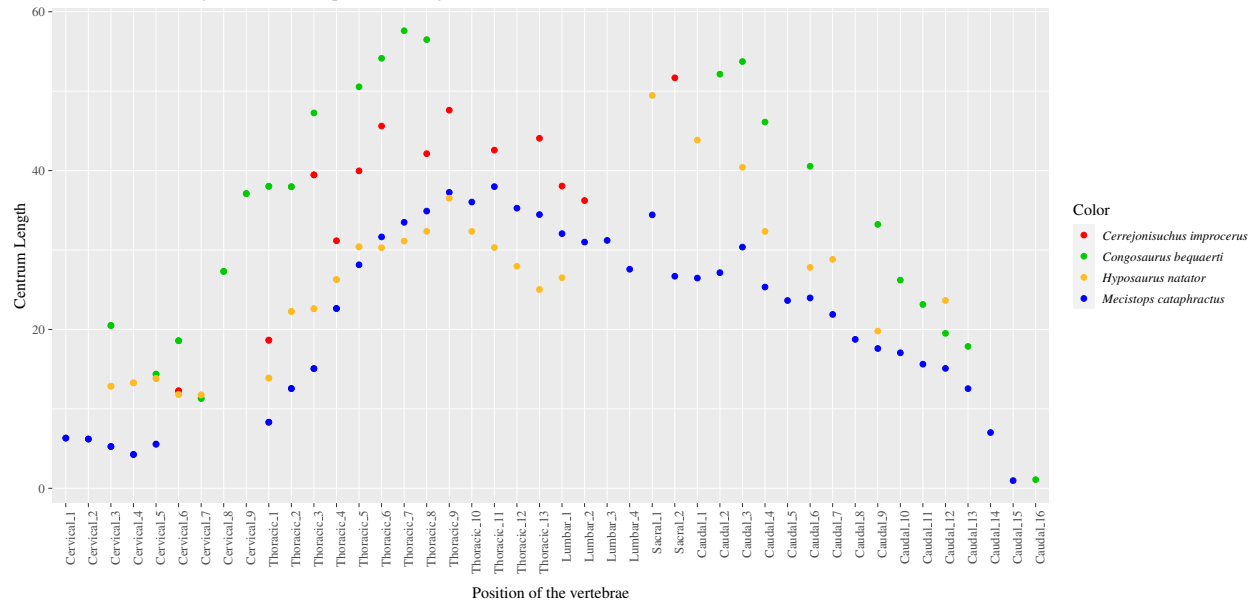

**Figure SI 10.** Scatter plot of the variation of the lateral process maximal length throughout the axial skeleton of *Congosaurus bequaerti*, *Mecistops cataphractus* (RBNIS 18374), *Hyposaurus natator* (NSJM 23368), and *Crerejonisuchus improcerus* (UF/IGM 31). Position of each vertebrae listed on the abscissa axis.

Ratio neural spine height over length of centrum throughout the axial skeleton of *Congosaurus*, *Mecistops*, *Cerrejonisuchus*, *Hyposaurus*

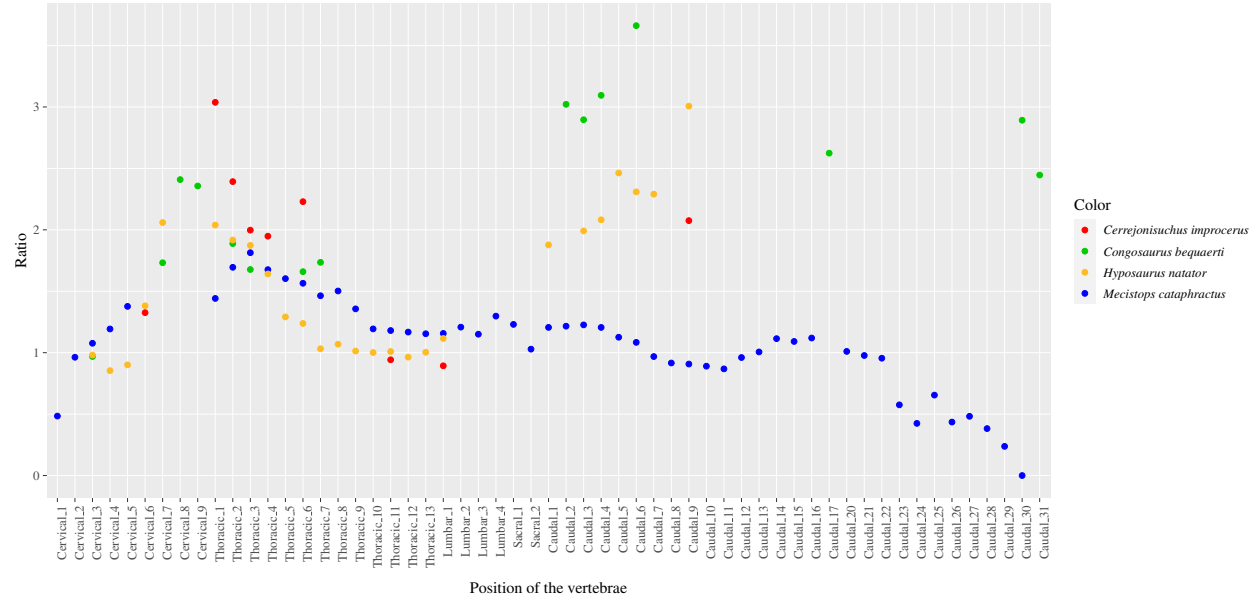

**Figure SI 11.** Scatter plot of the variation of ratio of the neural spine height over the centrum length throughout the axial skeleton of *Congosaurus bequaerti*, *Mecistops cataphractus* (RBNIS 18374), *Hyposaurus natator* (NSJM 23368), and *Cerrejonisuchus improcerus* (UF/IGM 31). Position of each vertebrae listed on the abscissa axis.

Ratio lateral process length over height of neural spine throughout the axial skeleton of *Congosaurus*, *Mecistops*, *Cerrejonisuchus*, *Hyposaurus*

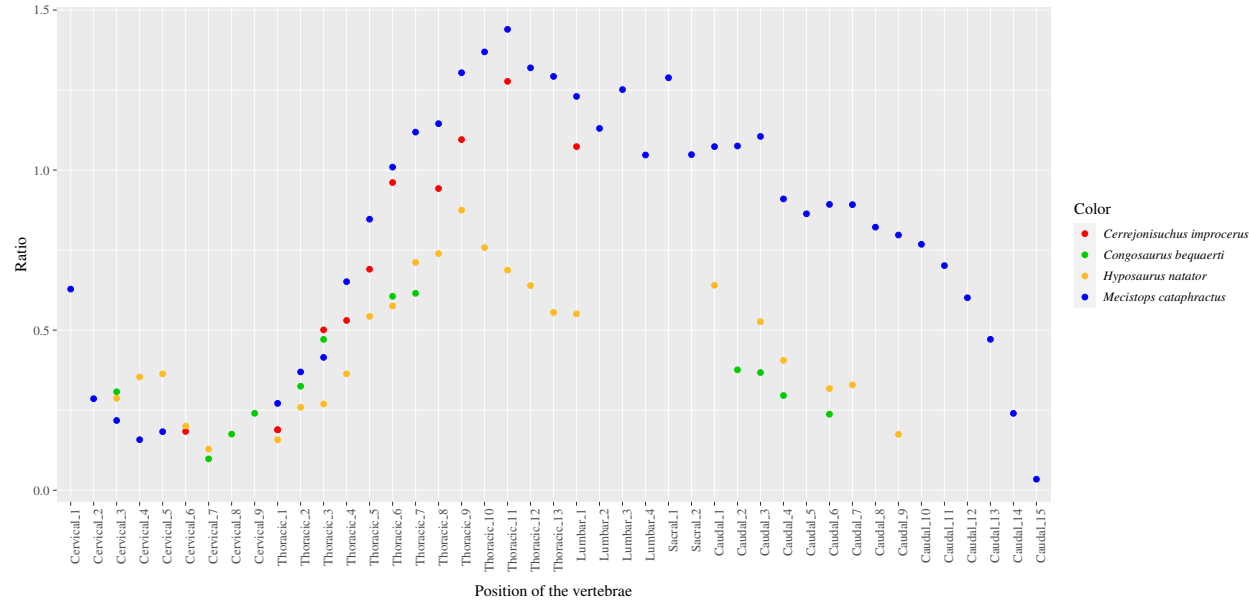

**Figure SI 12.** Scatter plot of the variation of ratio of the lateral process length over the neural spine height throughout the axial skeleton of *Congosaurus bequaerti*, *Mecistops cataphractus* (RBNIS 18374), *Hyposaurus natator* (NSJM 23368), and *Cerrejonisuchus improcerus* (UF/IGM 31). Position of each vertebrae listed on the abscissa axis.

Variation of the neural spine angle throughout the axial skeleton of *Congosaurus*, *Mecistops*, *Cerrejonisuchus*, *Hyposaurus*

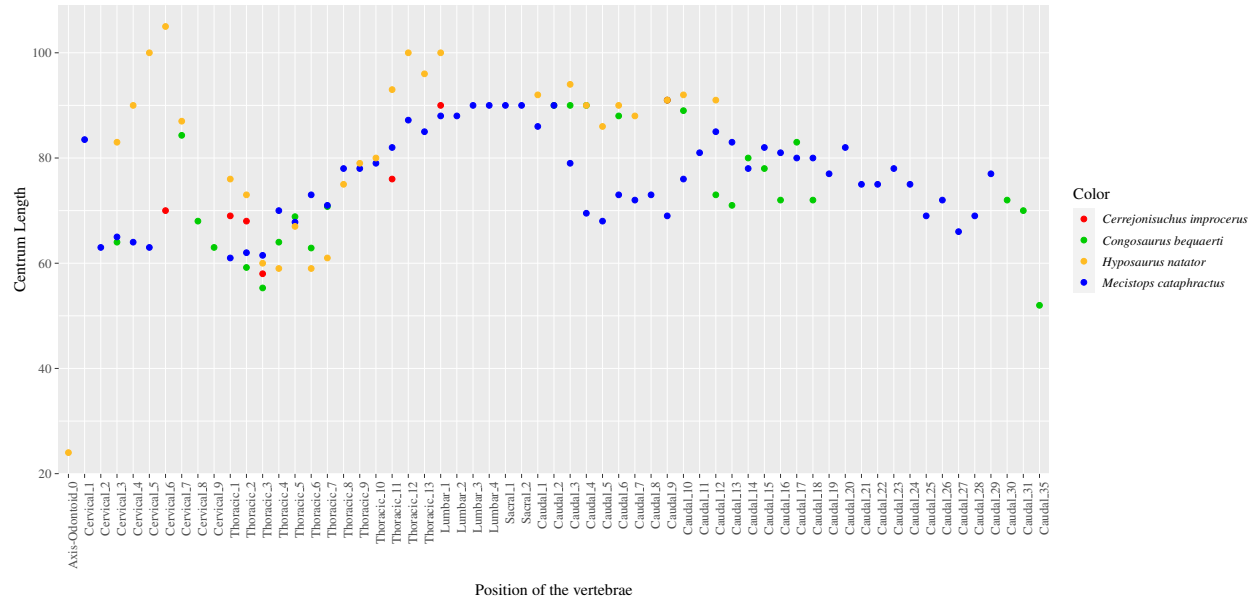

**Figure SI 13.** Scatter plot of the variation of the angle (in degrees) of the neural spine to the coronal plane throughout the axial skeleton of *Congosaurus bequaerti*, *Mecistops cataphractus* (RBNIS 18374), *Hyposaurus natator* (NSJM 23368), and *Cerrejonisuchus improcerus* (UF/IGM 31). Position of each vertebrae listed on the abscissa axis.

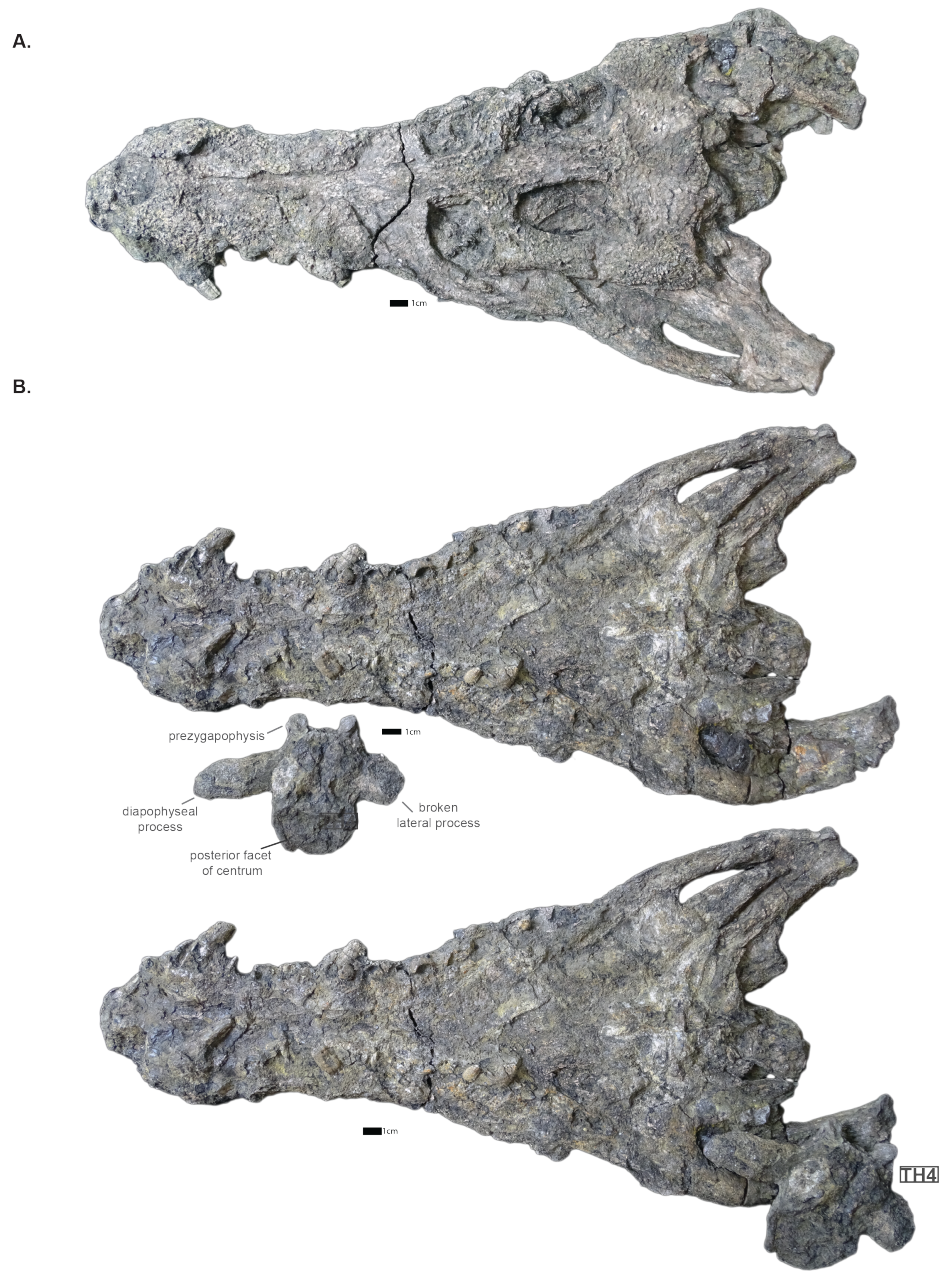

**Figure SI 14.** Skull and anterior thoracic vertebrae of *Cerrejonisuchus improcerus* UF/IGM 31. Thoracic vertebrae is in posterior view. **A.** dorsal view of the skull; **B.** ventral view of the skull.

## F LISTS OF INDIVIDUALS

|    | Species                                                                       | Inventory number |
|----|-------------------------------------------------------------------------------|------------------|
| 1  | <i>Cerrejonisuchus improcerus</i>                                             | UF/IGM 31        |
| 2  | <i>Congosaurus bequaerti</i>                                                  | MRAC 1741        |
| 3  | <i>Hyposaurus natator</i>                                                     | NJSM 23368       |
| 4  | Hyosaurinae indet.                                                            | YPM VP.000764    |
| 5  | <i>Anthracosuchus balrogus</i>                                                | UF/IGM 68        |
| 6  | <i>Anthracosuchus balrogus</i>                                                | UF/IGM 67        |
| 7  | <i>Metriorhynchus cultridens</i>                                              | NHM VP R3804     |
| 8  | <i>Lemmysuchus obtusidens</i>                                                 | NHM VP R3168     |
| 9  | <i>Crocodylus rhombifer</i>                                                   | AMNH FARB 16624  |
| 10 | <i>Hyposaurus natator</i>                                                     | YPM VP.000985    |
| 11 | <i>Hyposaurus natator</i>                                                     | YPM VP.000380    |
| 12 | <i>Hyposaurus natator oweni</i>                                               | YPM VP.000753    |
| 13 | <i>Mecistops cataphractus</i>                                                 | RBINS 18374      |
| 14 | <i>Platysuchus multiscrobiculatus</i>                                         | SMNS9930         |
| 15 | <i>Steneosaurus bollensis</i>                                                 | SMNS 9428        |
| 16 | <i>Pelagosaurus typus</i>                                                     | SMNS 80065       |
| 17 | <i>Metriorhynchus moreli</i>                                                  | SMNS 10116       |
| 18 | <i>Machimosaurus hugii</i>                                                    | SMNS 81608       |
| 19 | <i>Dacosaurus maximus</i>                                                     | SMNS 8203        |
| 20 | <i>Machimosaurus buffetauti</i>                                               | SMNS 91415       |
| 21 | <i>Crocodylus porosus</i>                                                     | R.G. 294         |
| 22 | Cf. <i>Gavialosuchus americanus</i> or <i>Thecachampsia americana</i> ~Brochu | ANSP 9369        |
| 23 | <i>Terminonaris browni</i>                                                    | AMNH FARB 5844   |
| 24 | <i>Suchodus superciliosus</i>                                                 | AMNH FARB 997    |
| 25 | <i>Thoracosaurus neocesariensis</i>                                           | NJSM 15437       |
| 26 | <i>Dyrosaurus maghribensis</i>                                                | NHM VP R 36759   |
| 27 | <i>Suchodus durobrivensis</i>                                                 | NHM VP R 2618    |

**Table SI 1.** Total list of crocodyliform specimens (27) before application of completeness thresholds from the main analysis.



|    | Species                           | Inventory number |
|----|-----------------------------------|------------------|
| 1  | <i>Congosaurus bequaerti</i>      | MRAC 1741        |
| 2  | <i>Cerrejonisuchus improcerus</i> | UF/IGM 29        |
| 3  | <i>Cerrejonisuchus improcerus</i> | UF/IGM 31        |
| 4  | <i>Cerrejonisuchus improcerus</i> | UF/IGM 32        |
| 5  | <i>Anthracosuchus balrogus</i>    | UF/IGM 67        |
| 6  | <i>Anthracosuchus balrogus</i>    | UF/IGM 69        |
| 7  | <i>Hyposaurus rogersii</i>        | ANSP 8631;8629   |
| 8  | <i>Hyposaurus natator</i>         | YPM VP.000985    |
| 9  | <i>Hyposaurus rogersii</i>        | NJSM 10861       |
| 10 | <i>Dyrosaurus maghribensis</i>    | NHM VP R 36759   |
| 11 | <i>Hyposaurus rogersii</i>        | NJSM 23368       |

**Table SI 2.** Total list of dyrosaurid individuals before application of completeness thresholds in the cranial analysis

|    | Species                             | Inventory number     |
|----|-------------------------------------|----------------------|
| 1  | <i>Congosaurus bequaerti</i>        | MRAC 1741            |
| 2  | <i>Cerrejonisuchus improcerus</i>   | UF/IGM 29            |
| 3  | <i>Cerrejonisuchus improcerus</i>   | UF/IGM 31            |
| 4  | <i>Cerrejonisuchus improcerus</i>   | UF/IGM 32            |
| 5  | <i>Cerrejonisuchus improcerus</i>   | UF/IGM 30            |
| 6  | <i>Anthracosuchus balrogus</i>      | UF/IGM 67            |
| 7  | <i>Acherontisuchus guajiraensis</i> | UF/IGM 35            |
| 8  | <i>Acherontisuchus guajiraensis</i> | UF/IGM 38            |
| 9  | <i>Acherontisuchus guajiraensis</i> | UF/IGM 34            |
| 10 | <i>Anthracosuchus balrogus</i>      | UF/IGM 69            |
| 11 | <i>Acherontisuchus guajiraensis</i> | UF/IGM 37            |
| 12 | Hyosaurinae indet.                  | ANSP 8651            |
| 13 | Hyosaurinae indet.                  | ANSP 8638            |
| 14 | Hyosaurinae indet.                  | ANSP 8648            |
| 15 | Hyosaurinae indet.                  | ANSP 8635            |
| 16 | Hyosaurinae indet.                  | ANSP 8631;8629       |
| 17 | Hyosaurinae indet.                  | ANSP 9682-93         |
| 18 | Hyosaurinae indet.                  | ANSP 9631-79         |
| 19 | Hyosaurinae indet.                  | ANSP 15364           |
| 20 | Hyosaurinae indet.                  | ANSP 13656           |
| 21 | Hyosaurinae indet.                  | AMNH FARB 1421       |
| 22 | Hyosaurinae indet.                  | AMNH FARB 1416       |
| 23 | Hyosaurinae indet.                  | AMNH FARB 1432       |
| 24 | Hyosaurinae indet.                  | AMNH FARB 1432 19205 |
| 25 | Hyosaurinae indet.                  | AMNH FARB 1432       |
| 26 | Hyosaurinae indet.                  | AMNH FARB 2389-2390  |
| 27 | Hyosaurinae indet.                  | AMNH FARB 2390       |
| 28 | Hyosaurinae indet.                  | AMNH FARB 2390       |
| 29 | Hyosaurinae indet.                  | AMNH FARB 19205      |
| 30 | Hyosaurinae indet.                  | AMNH FARB 2202       |
| 31 | Hyosaurinae indet.                  | AMNH FARB 19204      |
| 32 | Hyosaurinae indet.                  | AMNH FARB 1459       |
| 33 | <i>Hyosaurus natator</i>            | YPM VP.000985        |
| 34 | <i>Hyosaurus natator</i>            | YPM VP.000380        |
| 35 | <i>Hyosaurus natator (oweni)</i>    | YPM VP.000753        |
| 36 | <i>Hyosaurus</i> sp.                | YPM VP.000764        |
| 37 | <i>Hyosaurus natator</i>            | NJSM 23368           |
| 38 | Hyosaurinae indet.                  | NJSM 12293           |
| 39 | <i>Hyosaurus</i> sp.                | NJSM 10861           |
| 40 | <i>Dyrosaurus maghribensis</i>      | NHM VP R 36759       |

**Table SI 3.** Total list of dyrosaurid specimens (40) before application of completeness thresholds in the postcranial analysis.

| Package    | Use                                                                                                                                      |
|------------|------------------------------------------------------------------------------------------------------------------------------------------|
| APE        | Multivariate analysis, PcoA                                                                                                              |
| VEGAN      | Test the statistical significance of the clusters w/ PERMANOVA (Permutational Multivariate Analysis of Variance Using Distance Matrices) |
| PSYCH      | Functions for multivariate analysis                                                                                                      |
| DENDEXTEND | Cut a Tree (Dendrogram/hclust/phylo) into Groups of Data from the cluster dendrogram results (clust_result); perform tanglegram          |
| PVCLUST    | Creates a tree to represent the ecomorpho groups that exist in our matrix data.s                                                         |
| DBI        | To communicate with sqlite database                                                                                                      |
| GGPLOT 2   | To plot figures                                                                                                                          |
| GGNEWSCALE | To have more than one colour or fill scale in a plot using ggplot2                                                                       |

**Table SI 4.** Table depicting R packages employed.

106

## 107 REFERENCES

- 108 T. L. Adams, M. J. Polcyn, O. Mateus, D. A. Winkler, and L. L. Jacobs. First occurrence of the long-  
109 snouted crocodyliform *Terminonaris* (Pholidosauridae) from the Woodbine Formation (Cenomanian)  
110 of Texas. *Journal of Vertebrate Paleontology*, 31(3):712–716, 2011. ISSN 02724634. doi: 10.1080/  
111 02724634.2011.572938.
- 112 E. Buffetaut. Radiation évolutive, paléoécologie et biogéographie des crocodiliens méso-suchiens. *Mémoire*  
113 *de la Société Géologique de France*, 142:88, 1981.
- 114 K. Carpenter. *Thoracosaurus neocesariensis* (De Kay, 1842) (Crocodylia: Crocodylidae) from the Late  
115 Cretaceous Ripley Formation of Mississippi. *Mississippi Geology*, 4:10, 1983. ISSN 1098-6596. doi:  
116 10.1017/CBO9781107415324.004.
- 117 R. K. Denton, J. L. Dobie, and D. C. Parris. The marine crocodylian *Hyposaurus* in North America.  
118 *Ancient Marine Reptiles*, pages 375–397, 1997. doi: 10.1016/b978-012155210-7/50020-x.
- 119 A. K. Hastings, J. I. Bloch, E. A. Cadena, and C. A. Jaramillo. A new small short-snouted dyrosaurid  
120 (Crocodylomorpha, Mesoeucrocodylia) from the Paleocene of Northeastern Colombia. *Journal of*  
121 *Vertebrate Paleontology*, 30(1):139–162, 2010.
- 122 A. K. Hastings, J. I. Bloch, and C. A. Jaramillo. A new longirostrine dyrosaurid (Crocodylomorpha,  
123 Mesoeucrocodylia) from the Paleocene of north-eastern Colombia: biogeographic and behavioural  
124 implications for New-World Dyrosauridae. *Palaeontology*, 54(5):1095–1116, 2011. ISSN 00310239.  
125 doi: 10.1111/j.1475-4983.2011.01092.x.
- 126 A. K. Hastings, J. I. Bloch, and C. Jaramillo. A new blunt-snouted dyrosaurid, *Anthracosuchus balrogus*  
127 gen. et sp. nov. (Crocodylomorpha, Mesoeucrocodylia), from the Palaeocene of Colombia. *Historical*  
128 *Biology*, pages 1–23, 2014.
- 129 S. Jouve, M. Iarochène, B. Bouya, and M. Amaghaz. A new species of *Dyrosaurus* (Crocodylomorpha,  
130 Dyrosauridae) from the early Eocene of Morocco: phylogenetic implications. *Zoological Journal of*  
131 *the Linnean Society*, 148:603–656, 2006.
- 132 S. Jouve, C. de Muizon, R. Cespedes-Paz, V. Sossa-Soruco, and S. Knoll. The longirostrine crocodyliforms  
133 from Bolivia and their evolution through the Cretaceous–Palaeogene boundary. *Zoological Journal of*  
134 *the Linnean Society*, pages 1–35, 2020. ISSN 0024-4082. doi: 10.1093/zoolinnean/zlaa081.
- 135 J. V. T. Lara. Florida vertebrate fossils *Thecachampsa americana*, 2012. URL <https://www.floridamuseum.ufl.edu/florida-vertebrate-fossils/species/thecachampsa-americana/>.

- 138 D. J. Morgan, R. K. Denton, and R. E. Weems. Presence of a dyrosaurid neosuchian in the Sev-  
139 ern/Brightseat Formation of Maryland. *The Mosasaur The Journal of the Delaware Valley Paleontolog-  
140 ical Society*, 10:91–104, 2018.
- 141 H. F. Osborn. *Teleorhinus browni*, a teleosaur in the Fort Benton. *Bulletin of the American Museum of  
142 Natural History*, 20:239–240, 1904.
- 143 D. Schwarz, E. Frey, and T. Martin. The postcranial skeleton of the Hyposaurinae (Dyrosauridae;  
144 Crocodyliformes). *Palaeontology*, 49(4):695–718, 2006.
- 145 D. Schwarz-Wings, E. Frey, and T. Martin. Reconstruction of the Bracing System of the Trunk and Tail in  
146 Hyposaurine Dyrosaurids (Crocodylomorpha; Mesoeucrocodylia). *Journal of Vertebrate Paleontology*,  
147 29(2):453–472, 2009.
- 148 E. L. Troxell. *Hyposaurus*, a marine crocodilian. *American Journal of Science*, 9(54):489–514, 1925.
- 149 E. W. Wilberg, A. H. Turner, and C. A. Brochu. Evolutionary structure and timing of major habitat shifts  
150 in Crocodylomorpha. *Scientific reports*, 9(514):1–10, 2019. doi: 10.1038/s41598-018-36795-1.
- 151 X.-C. Wu, A. P. Russell, and S. L. Cumbaa. *Terminonaris* (Archosauria: Crocodyliformes): new material  
152 from Saskatchewan, Canada, and comments on its phylogenetic relationships. *Journal of Vertebrate  
153 Paleontology*, 21(3):492–514, 2001. ISSN 0272-4634. doi: 10.1671/0272-4634(2001)021.
- 154 J. Yans, M. Amaghazaz, B. Bouya, H. Cappetta, P. Iacumin, L. Kocsis, M. Mouflih, O. Selloum, S. Sen,  
155 J. Y. Storme, and E. Gheerbrant. First carbon isotope chemostratigraphy of the Ouled Abdoun  
156 phosphate Basin, Morocco; implications for dating and evolution of earliest African placental mammals.  
157 *Gondwana Research*, 25(1):257–269, 2014. ISSN 1342937X. doi: 10.1016/j.gr.2013.04.004.
- 158 M. T. Young, S. L. Brusatte, M. Ruta, and M. B. de Andrade. The evolution of Metriorhynchoidea  
159 (Mesoeucrocodylia, Thalattosuchia): an integrated approach using geometric morphometrics, analysis  
160 of disparity, and biomechanics. *Zoological Journal of the Linnean Society*2, 158:801–859, 2010.
